1 Immune response to an endotoxin challenge involves multiple immune parameters and is  
2 consistent among the annual-cycle stages of a free-living temperate zone bird

3

4 Arne Hegemann<sup>1\*</sup>, Kevin D. Matson<sup>1</sup>, Maaïke A. Versteegh<sup>1</sup>, Auxiliadora Villegas<sup>2</sup> & B.  
5 Irene Tieleman<sup>1</sup>

6

7 <sup>1</sup>Animal Ecology Group, Centre for Ecological and Evolutionary Studies, University of  
8 Groningen, P.O. Box 11103, 9700 CC Groningen, The Netherlands

9 <sup>2</sup>Conservation Biology Research Group, Faculty of Science, University of Extremadura,  
10 Avda. Elvas s/n 06071 Badajoz, Spain

11

12 \* Corresponding author, e-mail: a.hegemann@rug.nl.

13

14

15 Short title: Immune response throughout annual cycle

16

17

18

19

20

21

22

23

24

25

26

27

28

29

30

31

32

33

34

35 **Abstract**

36 Trade-offs between immune function and other physiological and behavioral processes are  
37 central in ecoimmunology, but one important problem is how to distinguish a reallocation of  
38 resources away from the immune system from a reallocation or redistribution within the  
39 immune system. While variation in baseline values of individual immune parameters is well  
40 established, studies in wild animals on multiple parameters during an immune response are  
41 lacking. It also remains to be tested if and how immune responses correlate with baseline  
42 values that vary e.g. over the course of an annual cycle. We studied immunological responses  
43 to an endotoxin challenge in skylarks (*Alauda arvensis*), a partial migrant bird breeding in  
44 temperate zones. We compared birds injected with the endotoxin LPS with un-injected  
45 controls, characterizing immunological responses with leukocyte profiles, titres of lytic  
46 enzymes and natural antibodies, and concentrations of haptoglobin and heat shock proteins.  
47 We did this in five annual-cycle stages to test if the response varied throughout the year. The  
48 endotoxin challenge affected 6 of 10 measured parameters. Lysis titers and proportions of  
49 heterophils increased; haptoglobin concentrations and proportions of lymphocytes, basophils  
50 and eosinophils decreased. The variable effects on different immune components demonstrate  
51 the complexity of an immune response. We found no evidence that the response differed  
52 between annual-cycle stages. The response was independent of baseline measures taken  
53 directly upon capture in the field, indicating that birds were facing no immunological ceiling  
54 when mounting an immune response. Values of five parameters collected under field  
55 conditions were significantly related to values taken under standardised lab conditions. We  
56 conclude that multiple parts of the immune system are modulated during an immunological  
57 response and that responses are not re-organised throughout the annual cycle.

58  
59 Key words: inflammation, ecological immunology, acute phase response, lipopolysaccharide  
60 (LPS), annual cycle, birds

61 **Introduction**

62 A central premise in ecological immunology is that animals trade off investment into immune  
63 function against other competing physiological and behavioral processes (Sheldon and  
64 Verhulst, 1996; Lochmiller and Deerenberg, 2000; Norris and Evans, 2000). However, one  
65 important problem that ecoimmunologists face is how to distinguish a reallocation of  
66 resources away from the immune system from a reallocation or redistribution within the  
67 immune system. Reductions in one or more elements of the immune system do not  
68 necessarily equate to a net reduction in immune function because other parts of the immune  
69 system might be boosted simultaneously (Adamo, 2004). Simultaneous measurements of  
70 multiple immune indices can help address this problem (Adamo, 2004; Matson et al., 2006;  
71 Boughton et al., 2011; Buehler et al., 2011; Demas et al., 2011). Yet, understanding trade-offs  
72 and interactions within the immune system requires an experimental challenge of the immune  
73 system and subsequent quantification of the response using multiple indices (Martin et al.,  
74 2006, 2008; Boughton et al., 2011; Pedersen and Babayan, 2011).

75 The immune system can be experimentally challenged by injection of an endotoxin  
76 like lipopolysaccharide (LPS), part of the cell wall of gram-negative bacteria (Owen-Ashley  
77 and Wingfield, 2007). As gram-negative bacteria are universal in most environments, an  
78 experimental challenge with LPS mimics a functional relevant natural situation. Injection of  
79 LPS initiates an immune response by mimicking the first stages of a bacterial infection  
80 without actually resulting in sustained disease. This innate response begins minutes after  
81 endotoxin detection and defends against threats that breach physical barriers like the skin.  
82 Most experimental studies on induced immune responses in free-living birds so far focus on  
83 hormonal, behavioural or metabolic changes (Bonneaud et al., 2003; Owen-Ashley and  
84 Wingfield, 2006, 2007; Owen-Ashley et al., 2006; Adelman et al., 2010; Hegemann et al.,  
85 2012b; reviewed by Hasselquist and Nilsson, 2012). Studies in free-living birds that  
86 characterise multiple immunological responses and subsystems simultaneously are lacking so  
87 far.

88 In addition to quantifying which parts of the immune system are affected by a  
89 simulated infection, experimental immune challenges can also be used to investigate the  
90 consistency of responses through time. Immune responses may be constant among annual-  
91 cycle stages, or responses may be seasonally reorganised as a result of trade-offs with other  
92 physiological and behavioural demands. Hypotheses relate increased energy demands and  
93 decreased resource availability to compromises in costly immune functions and shifts  
94 towards less costly immune components (Nelson and Demas, 1996; Nelson, 2004;

95 Hasselquist, 2007; Martin et al., 2008). Immunological mechanisms aimed at avoiding  
96 autoimmunity (Råberg et al., 1998) and preventing oxidative stress (Sorci and Faivre, 2009)  
97 might further influence this process. Several studies on non-induced (baseline) immune  
98 function indeed show that different indices express different seasonal patterns among and  
99 within annual-cycle stages (Nelson and Demas, 1996; Buehler et al., 2008; Pap et al., 2010a,  
100 b; Hegemann et al., 2012c). Thus, reorganisation of baseline immune function appears to  
101 depend on both environmental conditions and competing biotic processes. Data on seasonal  
102 variation in induced immune responses are scarce. However, these are the data needed to  
103 verify the hypothesis that free-living birds switch from costly inflammatory responses to  
104 highly specific but less costly antibody responses during demanding times (Lee, 2006). A  
105 study on captive red knots (*Calidris canutus*) provides evidence for saved costs on  
106 inflammatory response during demanding times (Buehler et al., 2009). In contrast, wild  
107 skylarks (*Alauda arvensis*) do not modulate the energetic investment in the acute phase  
108 response despite seasonal variation in energetic constraints. They maintain similar response  
109 throughout the annual cycle as measured by metabolic rate, body temperature, body mass  
110 loss, ketone and glucose concentrations (Hegemann et al., 2012b). The detailed knowledge of  
111 non-induced (baseline) immune function and energetic costs of an immune challenge in  
112 skylarks make this species an ideal candidate for studying the response of multiple immune  
113 indices during an immune challenge in different annual-cycle stages. Such a study will also  
114 provide a way to test if induced responses are modulated among annual-cycle stages  
115 (following patterns of baseline immune function), or if they are maintained throughout the  
116 year (reflecting patterns of energetic costs).

117         Variability in baseline immunological values might also represent important  
118 constraints for responses because the ability to mount an immune response might depend on  
119 baseline values. For example, baseline haptoglobin concentrations in pigeons (*Columba livia*  
120 *domestica*) have some capacity to predict post-challenge response concentrations (Matson et  
121 al., 2012). Great tits (*Parus major*) with high pre-immunisation heterophil/lymphocyte ratios  
122 mount weaker antibody responses (Krams et al., 2012). However, it remains to be tested in  
123 free-living birds if particularly high (or low) baseline values of a given immune parameter  
124 limit the responsiveness of that parameter to an immunological stimulus (i.e. ‘immunological  
125 ceiling’). In other words, do individuals with relatively high baseline values respond  
126 differently to an immune challenge than birds with relatively low levels? The existence of  
127 immunological ceilings can have important implications for the interpretation of values  
128 collected from field samples.

129 In this study, we challenged wild skylarks with LPS and compared them with un-  
130 injected controls during five annual-cycle stages to test 1. which immune parameters are  
131 affected by an endotoxin challenge, 2. if the immunological response varies among annual-  
132 cycle stages, and 3. if baseline values present constraints to the magnitude of the immune  
133 response. To capture a broad picture of the immune response we measured different  
134 components of immune defence. i) Natural antibodies and complement which agglutinate and  
135 lyse foreign cells (Matson et al., 2005) and are measures thought to be unaffected by previous  
136 exposure (Ochsenbein and Zinkernagel, 2000). ii) The acute phase protein haptoglobin,  
137 which limits the role of plasma iron as nutrient for pathogens and is a initiator of oxidative  
138 damage (Murata et al., 2004; Quaye, 2008). iii) The relative abundances of leukocytes, which  
139 reflect both innate and acquired components of immune function. Leukocytes are circulating  
140 continuously through the blood to maintain a state of readiness and are redistributed in  
141 response to immunological stimulation (Feldman et al., 2000). Leukocyte analyses include  
142 the heterophil/lymphocyte ratio (hereafter H/L-ratio) which is related to immunological and  
143 other stressors (reviewed by Davis et al., 2008). iv) Heat shock proteins (hereafter HSP),  
144 which indicate stress (Martinez-Padilla et al., 2004) and have been suggested to be a potential  
145 indicator for autoimmune risk (Hasselquist and Nilsson, 2012). Furthermore they play an  
146 important role in modulating innate and acquired immunity (Pockley, 2003; Pockley et al.,  
147 2008) through their capacity to activate complement and trigger the release of inflammatory  
148 cytokines (Calderwood et al., 2007).

149

## 150 **Methods**

### 151 Study subjects

152 We caught adult skylarks during five annual-cycle stages in the northern Netherlands in 2008  
153 focusing on our study population at the Aekingerzand (N 52°55'; E 6°18'; (Hegemann et al.,  
154 2012b). Some skylarks in our study population migrate; others winter locally and are  
155 accompanied by birds that breed further north and east (Hegemann et al., 2010). We caught  
156 birds during breeding in June and July (9 males, 6 females, hereafter m & f), molt in August  
157 and September (12 m, 7 f), autumn migration in October (12 m, 12 f), winter in December  
158 and January (14 m, 3 f), and spring migration in March (17 m, 9 f). Birds were sexed  
159 biometrically, and in some doubtful cases molecularly (Hegemann et al., 2012a). For details  
160 on catching see Hegemann et al. (2012b). All individuals were fully grown. Because skylarks  
161 undergo a complete post-nuptial moult in August-September, age classes could not be  
162 distinguished. Since skylarks breed in their first year (Hegemann unpublished data) and both

163 young and adult birds are known to migrate (van Dobben and Mörzer Bruyna, 1939;  
164 Hegemann et al., 2010), we have no indications that an age bias between stages exists and  
165 could influence the interpretation of the results.

166

#### 167 Sampling protocol

168 When catching skylarks in the field we collected blood (~150 uL) into heparinised capillary  
169 tubes from the brachial vein after capture (median: 5 min; range: 2.25-30 min) to minimize  
170 any impacts of handling stress (Buehler et al., 2008). We then took structural measurements.  
171 We refer to measurements from these samples as “field values”.

172 After capture, birds were brought into captivity (cages 30x40x60 cm). During the  
173 breeding season, when skylarks are territorial, birds were housed individually. During the  
174 non-breeding seasons, when skylarks live in socially interacting flocks, birds were housed in  
175 small groups ( $\leq 3$  birds per cage). Even though the captivity period was short, we attempted  
176 to avoid a potential seasonal bias by using conditions that reflected current social conditions  
177 in the wild. Birds had access to *ad libitum* water and food (mealworms and seeds) until 4:30  
178 p.m. on the experimental-protocol start day (for details, see Hegemann et al., 2012b).

179 We started the experimental protocol with isolating birds in a dark box for 1 h without  
180 food and water. At 5:30 p.m. we injected experimental birds with 2.5 mg LPS in 10 ml PBS  
181 per kg body mass in their abdominal cavities (Hegemann et al., 2012b). Control birds  
182 remained un-injected, because puncturing the skin and underlying tissues for injecting only a  
183 vehicle (i.e. PBS) can result in inflammation (K. Klasing and B. Helm, personal  
184 communications). Consequently, the experimental responses must be viewed as a result of  
185 both LPS and injection procedure. This combination does not pose interpretational problems  
186 for our study since our central interest is immune response and not the effects of LPS per se.  
187 After injection the experimental birds and their corresponding controls were put into dark  
188 boxes (metabolic chambers) where they spent the night at thermo neutral conditions  
189 (Hegemann et al., 2012b). The next morning at 6:30 a.m. (13 h after injecting experimental  
190 birds) we collected another blood sample (150 uL) within 10 min of removing birds from  
191 boxes. The 13 hour interval between start of the experiment and taking a blood sample was  
192 based on the ability to match metabolic measurements with blood sampling in a time frame in  
193 which most physiological and behavioural reactions occur (e.g. Owen-Ashley et al., 2006;  
194 Adelman et al., 2010; Burness et al., 2010) and with the need to return birds, especially  
195 during the breeding season, quickly to the field.

196 From each blood sample (field and lab), we used a small drop to make blood smears  
197 for leukocyte enumeration. The remainder of each sample was centrifuged at 7000 rpm for 10  
198 min. Plasma and red blood cells were separated and stored at -20°C. Upon completion of the  
199 protocol, birds were released at the site of capture.

200 Because the stress of short-term captivity might affect immune function differently in  
201 different seasons (Sapolsky et al., 2000; Martin, 2009), we evaluated the effects of stress  
202 throughout the annual cycle. For this purpose, we used H/L-ratios (Gross and Siegel, 1983;  
203 Vleck et al., 2000; Davis, 2005; Huff et al., 2007) and HSP70 concentrations (Martinez-  
204 Padilla et al., 2004; Bourgeon et al., 2006). We favored these two independent and  
205 functionally integrative methods over concentrations of specific hormones (e.g.,  
206 corticosterone) since the effects of hormones can depend strongly on levels of binding  
207 globulins and other related factors (Deviche et al., 2001; Lynn et al., 2003). In order to  
208 separate the stress of captivity and general protocols (experienced by all birds) from the stress  
209 response of the immune challenge (experienced only by experimental birds), we explored  
210 seasonal variation in stress response in the control birds. With these birds, we calculated  
211 differences between values from field samples and morning lab samples ( $\Delta$  H/L-ratio and  $\Delta$   
212 HSP70). While, both indices increased as expected due to the stress associated with captivity,  
213 we found no significant seasonal pattern in this captivity-related stress response ( $\Delta$  H/L-ratio  
214  $\chi^2_{4,46}=4.04$ ,  $p=0.40$ ;  $\Delta$  HSP70  $\chi^2_{4,45}=0.40$ ,  $p=0.53$ ). Furthermore, there were no differences in  
215 the metabolic effects (O<sub>2</sub> consumption and nightly mass loss) of an LPS-injection when  
216 comparing birds that were held in captivity for a few hours according to the protocol used in  
217 this study and birds acclimated to captivity for 55 days (Hegemann et al. 2012b). Thus we  
218 have no evidence that the immune response we experimentally triggered was masked by any  
219 stress responses resulting from the short time in captivity. Experiments were performed under  
220 license DEC5219B of the Institutional Animal Care and Use Committee of the University of  
221 Groningen.

222

### 223 Immune assays

224 We used a hemolysis-hemagglutination assay (rabbit red blood cells, B-0009H; Harlan,  
225 Leicestershire, United Kingdom) to quantify titers of complement-like lytic enzymes (i.e.,  
226 lysis) and non-specific natural antibodies (i.e., agglutination) in plasma (Matson et al., 2005;  
227 Hegemann et al., 2012c). Scans of individual samples were randomized among all plates and  
228 scored blindly to treatment and season (by AH). A plasma standard was run in duplicate in all  
229 plates. On average, variation (standard deviation) within (0.4 lysis titers and 0.7 agglutination



230 titers) and among (0.5 lysis titers and 1.1 agglutination titers) plates is similar to that  
231 originally described by Matson et al. (2005). We used a commercially available colorimetric  
232 assay kit (TP801; Tri-Delta Diagnostics, NJ, USA) to quantify haptoglobin concentrations  
233 ( $\text{mg ml}^{-1}$ ) in plasma samples (Hegemann et al., 2012c; Matson et al., 2012). Blood smears  
234 were examined by one person (C. Gottland), who was blind to treatment and season. The first  
235 100 white blood cells (WBC) per slide were identified and counted as lymphocytes,  
236 heterophils, basophils, monocytes or eosinophils (Hegemann et al., 2012c).

237

### 238 Heat shock proteins (Hsp70)

239 Cell lysates were obtained as in Tomas et al. (2004) and total protein concentration was  
240 determined by the Bradford method using bovine serum albumin (BSA) as the standard.  
241 Concentrations of Hsp70 were determined from the cell lysates by means of an enzyme  
242 linked immunosorbent assay (ELISA) using the protocol described by Mahmoud and Edens (  
243 2003). Briefly, 100  $\mu\text{l}$  of samples (dilution 1:10), standards (0-50 ng recombinant human  
244 Hsp70) and a positive control (HeLa Cell Lysate) were coated in duplicate in 96-well  
245 immunoplates at  $4^{\circ}\text{C}$  overnight. After blocking non-specific binding sites, plates were  
246 incubated 1 h with 100  $\mu\text{l}$  of anti-Hsp70 monoclonal antibody (H5147; Sigma) diluted 1:1000.  
247 Following washing, plates were incubated with 100  $\mu\text{l}$  of 1:5000 alkaline phosphatase  
248 conjugated goat anti-mouse IgG polyclonal antibody (SAB-101; Stressgen) for 1h. Finally we  
249 added 1  $\text{mg ml}^{-1}$  pNPP in coating buffer for 30 min, and read the absorbance of individual  
250 wells at 405 nm with a microplate reader (PowerWave; BioTek). Hsp70 concentration was  
251 calculated from the standard curve. All final Hsp70 values were standardized by dividing  
252 Hsp70 concentration by total protein and normalized according to plate-specific positive  
253 controls to facilitate inter-plate comparisons. Based on samples run in duplicate, the mean  
254 intra-assay coefficient of variation was 5.9% and mean inter-assay coefficient of variation  
255 was 6.6%.

256

### 257 Statistics

258 We compared experimental and control groups for each response variable using linear models  
259 analysed in R, version 2.9.2 (R Development Core Team, 2009). We included treatment,  
260 annual-cycle stage, sex and all possible interactions as explanatory variables. White blood  
261 cell types were analysed with generalized linear models with a quasi-binomial approach and  
262 F-tests. These tests incorporated the counts of one cell type and the total remaining WBC



263 number (e.g. basophils against the sum of heterophils, lymphocytes, monocytes and  
264 eosinophils using the 'c-bind' function in R). H/L-ratios were tested in a linear model.

265 To test if baseline values as taken upon capture in the field affected the outcome of  
266 the experiment, we calculated the individual deviation from season- and sex-specific means.  
267 We included this sex- and season-independent term and the interaction with treatment in all  
268 analyses. A ceiling in the ability to respond would be indicated by a significant interaction. A  
269 significant main effect would indicate that individuals express consistent immune parameters  
270 in the field and in the lab after having gone through a standardised experimental protocol in  
271 the preceding 14 hour period.

272 We always started with the full model and simplified it using backwards elimination  
273 based on log likelihood ratio test with  $P < 0.05$  as selection criterion ("drop1" in R) until  
274 reaching the minimal adequate model. Model assumptions were checked using the residuals  
275 of the final model. Sample sizes, which are provided in the figures, differ among response  
276 variables due to insufficient plasma volume. Graphs were made using the package "gplots"  
277 (Warnes, 2009). Baseline values, measured in the field just after capture, did not differ  
278 significantly between experimental and control groups in any of the 10 parameters measures  
279 (always  $p > 0.25$ ).

280

## 281 **Results**

### 282 Immunological responses after endotoxin challenge

283 Compared with control birds, injected skylarks exhibited significantly increased lysis 13  
284 hours after an endotoxin challenge (Fig. 1A), but experimental and control birds did not differ  
285 significantly in terms of agglutination (Fig. 1B). Concentrations of haptoglobin were  
286 significantly lower in endotoxin-challenged birds (Fig. 1C). Experimental birds had  
287 significantly higher proportions of heterophils than control birds (Fig. 1E). The proportions of  
288 lymphocytes, basophils and eosinophils were lower in experimental birds (Fig. 1F,B,I). The  
289 H/L-ratio, the proportion of monocytes and concentrations of Hsp70 were not affected by the  
290 endotoxin challenge (Fig. 1D,H,J). Thus, experimental birds differed significantly from  
291 control birds in 6 of the 10 physiological parameters (Table 1). We never found a significant  
292 difference between the sexes in their response to the endotoxin challenge (interaction  
293 treatment\*sex always  $\chi^2/F < 1.27$ ,  $p > 0.26$ ). Independent of treatment, males and females  
294 differed significantly in 2 of the 10 parameters in the morning after the injection (Table 1).  
295 Females exhibited significantly higher proportions of eosinophils among their WBCs

296 (females 10.6%, males 5.9%). Males had significantly higher haptoglobin concentrations  
297 (15.9%) and statistically-marginally higher lysis titers (16.1%) than females.

298

### 299 Seasonal variation in immune response

300 Based on samples taken in the morning in the lab, Skylarks showed significant differences  
301 among annual-cycle stages in 8 of the 10 measured parameters (Table 1, Fig. 1A-J), but the  
302 immune response after the endotoxin challenge did not differ among annual-cycle stages: the  
303 interaction between annual-cycle stage and endotoxin challenge was not significant for any of  
304 the measured parameters (Table 1, Fig. 1A-J).

305

### 306 Immunological ceiling and individual consistency

307 The response to the endotoxin challenge was independent of field immune values. Changes in  
308 immune parameters after the endotoxin challenge were always independent of the  
309 corresponding value measured in the field (interaction treatment\*deviation of the field value  
310 always  $\chi^2/F < 3.12$ ,  $p > 0.08$ ).

311 After accounting for treatment, individual skylarks showed values that were  
312 consistent between deviation of the field values and morning samples for 5 parameters. With  
313 lysis titer, haptoglobin concentration, the proportion of heterophils, lymphocytes and  
314 eosinophils, we found significant positive relationships between the field values (corrected  
315 for sex and season-variation) and the morning values (Table 1). There was no significant  
316 relationship between deviation of the field values and morning values for agglutination titer,  
317 the Hsp70 concentration, the H/L-ratio and the proportion of basophils and monocytes (Table  
318 1).

319

### 320 **Discussion**

321 Skylarks exhibited complex and multifaceted responses when experimentally challenged with  
322 endotoxin. Thirteen hours post-injection, some parameters increased (lysis titer, heterophil  
323 proportion), others decreased (haptoglobin concentration, proportion of lymphocytes,  
324 basophils and eosniophils) and others were unchanged (agglutination titers, H/L-ratio, Hsp70  
325 concentration and proportion of monocytes). The complexity of the immune response to  
326 endotoxin highlights methodological complications for ecoimmunologists trying to interpret  
327 samples and data collected from birds in the field. For example, relatively high or low values  
328 of one immune parameter should be interpreted cautiously when measured in isolation of  
329 other parameters. Despite its complexity, we found no evidence for seasonal reorganization

330 of the immune response, which was consistent among five annual-cycle stages. Furthermore,  
331 we found no evidence for an immunological ceiling; birds showed similar responses to an  
332 immunological challenge regardless of their baseline values measured from values collected  
333 in the field. After accounting for treatment, individuals showed consistent values in samples  
334 from the field and samples from the lab with lysis titer, haptoglobin concentration, H/L-ratio,  
335 and eosinophil proportions. This suggest that these measures are relatively robust against  
336 possible sources of variation like time of day, activity and nutritional status.

337

### 338 Physiological responses after immune challenge

339 One particularly surprising result that highlights the complications associated with assigning  
340 a single immune parameter, relates to haptoglobin. LPS-injected skylarks exhibited 13 hours  
341 post-challenge significantly lower concentrations of haptoglobin compared to un-injected  
342 control birds. Haptoglobin is an acute phase protein that is released from the liver during a  
343 pathogenic challenge. Normally in birds, concentrations of haptoglobin or iron-binding  
344 functional equivalents increase in association with inflammation (Thomas, 2000; van de  
345 Crommenacker et al., 2010). Our finding suggests that in skylarks haptoglobin might be more  
346 appropriately classified as a negative, rather than a positive, acute phase protein when  
347 measured 13 hours after the endotoxin challenge. Any functional relevance of the observed  
348 reductions in concentrations of this protein, which sequesters iron, remains to be elucidated.  
349 Notably, compared to other species that have been similarly assayed, skylarks maintain  
350 relatively high circulating concentrations of baseline haptoglobin (Matson, 2006). The  
351 decrease we observed in skylarks following LPS injection may relate to dissimilar rates of  
352 haptoglobin production and consumption in this species. This result also suggests a greater  
353 reliance of skylarks on constitutive (rather than induced) production of this bacteriostatic and  
354 antioxidant molecule. Testing these possibilities will require more detailed studies (e.g. with  
355 more frequent sample time points) of the LPS-induced inflammation time-course in skylarks  
356 and other species of birds. However, results of a pilot study showed that haptoglobin  
357 concentrations in skylarks decreased by 13 hours and remained low at 24 hours after an LPS  
358 injection (unpublished data of KDM).

359 Lysis titers of skylarks increased following endotoxin challenge, but there was no  
360 difference in agglutination (natural antibody) titers between control and experimental birds.  
361 Antibody production normally requires days not hours. Thus it is not surprising that  
362 agglutination titres did not differ between groups 13 hours post challenge. The increase in  
363 lysis titers during infection points to another important topic of ecoimmunology: High values

364 are not necessarily better (De Coster et al., 2011). Instead, values should be viewed in  
365 relation to the immunological status, e.g. by measuring parasite infection rates (Pap et al.,  
366 2011).

367         Circulating leukocytes are important for the protection against invading  
368 microorganisms. During immune responses redistributions of leukocytes populations occur  
369 (Gehad et al., 2002). In skylarks, proportions of heterophils increased and proportions of  
370 lymphocytes decreased following endotoxin challenge. Since heterophils relate to innate  
371 immunity and lymphocytes relate to acquired immunity, the innate inflammatory response we  
372 elicited could primarily affect heterophil concentrations (De Boever et al., 2009). However,  
373 upon an immune challenge a redistribution of peripheral blood lymphocytes to secondary  
374 lymphoid organs occurs (Gehad et al., 2002), and this process could contribute to reduced  
375 numbers of lymphocytes in the circulating blood. Basophils are one of the first leukocyte  
376 types to enter tissue during an early inflammatory response in birds (Katiyar et al., 1992). The  
377 decreased proportion of basophils suggests that these cells are no longer circulating in the  
378 peripheral blood and have migrated into the tissue at the LPS injection site. Given this  
379 biological functioning, we are confident that all observed changes in leukocyte profiles are  
380 meaningful, despite two relatively high p-values, which should be viewed with added caution  
381 in multiple testing (Moran, 2003).

382         We found no difference in concentrations of intracellular Hsp70 concentrations  
383 between control and experimental skylarks. Autoimmune reactions caused by physiological  
384 stress during an immune response might be an important cost of immunity (Räberg et al., 1998)  
385 and heat shock protein quantification could be an indirect way to assess the potential risks of  
386 autoimmune reactions (Hasselquist and Nilsson, 2012). Our data do not provide any evidence  
387 for increased physiological stress during the immune response to an endotoxin. Heat shock  
388 proteins also have more direct immunological functions. Extracellular levels of certain types,  
389 such as Hsp60 and Hsp70, exhibit modulating effects on innate and acquired immunity  
390 (Pockley, 2003; Pockley et al., 2008) and these proteins are involved in the activation of  
391 complement and release of cytokines (Calderwood et al., 2007). In rats intra- and  
392 extracellular heat shock protein concentrations are correlated (Fleshner et al., 2004). The lack  
393 of change in intracellular heat shock protein concentrations in immunologically challenged  
394 skylarks, despite increased complement activity, might indicate different relationships in wild  
395 birds. Detailed studies of both extracellular and intracellular heat shock protein  
396 concentrations at multiple time points following an immunological challenge are required to  
397 reveal the causes and consequences of heat shock protein variation in wild birds.

399 Consistent responses throughout the annual cycle

400 We found no evidence that the response of the immune system to endotoxin differed among 5  
401 annual-cycle stages experienced by skylarks. The reaction to the endotoxin challenge also did  
402 not differ between the sexes. These findings are in line with our previous finding that  
403 energetic components of an acute phase response (as measured by metabolic rate, body  
404 temperature, body mass loss, ketone and glucose concentrations) are not seasonally  
405 modulated in this species (Hegemann et al., 2012b). After statistical correction of the  
406 treatment effects, it is noteworthy that we found seasonal differences in eight of ten  
407 immunological parameters that we measured using samples collected in the lab. These data  
408 support our earlier findings that free-living skylarks modulate their baseline immune function  
409 among annual-cycle stages as measured on samples collected upon capture in the field  
410 (Hegemann et al., 2012c). Taken together, our results suggest that skylarks do modulate  
411 baseline values of immune function, as has been described for other species (Buehler et al.,  
412 2008; Pap et al., 2010a, b). However, both the energetic (Hegemann et al., 2012b) and the  
413 immunological (this study) consequences of an endotoxin challenge are constant throughout  
414 the year, independent of other annual-cycle demands and equal for both sexes. This suggests  
415 that mounting this type of immune response is crucial to survival and cannot be  
416 compromised. Only baseline defences can be traded off with other demands. This conclusion  
417 further highlights the interpretational limitations and the importance of distinguishing  
418 between baseline values and induced responses when studying ecological immunology  
419 (Adamo, 2004; Hegemann et al., 2012b, c).

420 This finding - that responses to an LPS-injection were constant throughout the annual  
421 cycle - necessitates a short discussion of two methodological points. First, skylarks in our  
422 study population are partial migrants: some birds migrate, others winter locally and get  
423 accompanied by birds from more northern and eastern breeding populations (Hegemann et  
424 al., 2010). With our year-round study focused on the breeding location, we potentially caught  
425 a mixture of birds from different populations during winter and migration. However, similar  
426 coefficients of variation (CV) throughout the annual cycle for each of the response variables  
427 demonstrate that any (unmeasured) variability in the composition of the sampled populations  
428 did not translate to differences in immunological variability. It is also supported by our data  
429 on baseline immune function (Hegemann et al, 2012c) and energetic effects of an immune  
430 challenge (Hegemann et al, 2012b). Consequently, immune responses to LPS-injection by  
431 skylarks seem to be relatively independent of breeding location and more dependent on

432 current local conditions. Second, as with any decision based on statistics, our acceptance of  
433 our null hypothesis was influenced by sample size, variance and effect size. Small sizes can  
434 undermine some hypotheses via type II errors or false negatives, but this is unlikely to occur  
435 consistently (e.g., as with all 10 dependent variables). Large sample sizes can minimize this  
436 type of error but sometimes detect differences that lack biological relevance. In principle,  
437 power analyses could provide insight into these issues, but in practice such analyses require  
438 precise input regarding strength, direction, timing, and variance, none of which are available  
439 for the interaction between LPS-treatment and annual-cycle stage. In light of these points, we  
440 feel confident that our sample sizes are sufficient to accept our null hypothesis and draw  
441 conclusions accordingly.

442

#### 443 Immunological ceiling and individual consistency

444 The strength of the immunological response as measured by 10 parameters was independent  
445 of the corresponding values measured upon capture in the field. Thus birds did not face an  
446 immunological ceiling, and similar immune responses were mounted regardless of an  
447 individual's baseline values. A corresponding pattern also exists at the population level as the  
448 immune response was independent of seasonal patterns of baseline values (see above).

449 Discarding the effect of the endotoxin challenge, several immune indices (lysis titer,  
450 haptoglobin concentration, the proportion of heterophils, lymphocytes and eosinophils) show  
451 a significant correlation between values from samples collected in the field and values from  
452 samples collected in the lab after birds had gone through a standard 14 hour protocol. After  
453 correction for treatment these parameters showed a positive correlation between the field and  
454 morning values. These results indicate that individuals exhibit consistent values in the face of  
455 variable environmental and physiological conditions. Birds sampled in the morning in the lab  
456 exhibited highly standardized conditions (temperature and light regime, food and water  
457 availability). However, in the field, at least some conditions varied, like time of the day and  
458 previous activity. While many factors are known to affect immune indices (e.g. diurnal  
459 patterns (Navarro et al., 2003; Martinez-Padilla, 2006); flight behavior (Matson et al., 2012)),  
460 skylarks showed consistent values for these five parameters independent of the conditions  
461 under which they were taken. This suggests that these indices are robust against short term  
462 (hours) biotic and abiotic environmental variation. Consequently they are suitable for  
463 ecoimmunologists interested in longer term environmental variation or in the immunological  
464 status of their study subjects.

465

## 466 **Acknowledgements**

467 Many volunteers helped catch skylarks at various times of the year. We are thankful to  
468 everyone, especially Kees van Eerde, Rob Voesten, Martin Keiser, Richard Ubels, and Chris  
469 Trierweiler. Cecile Gottland and Emmanuelle Gilot performed the slide counts. Isabel Piedad  
470 provided assistance in Hsp analysis. Ido Pen gave valuable advice on statistical tests.  
471 Discussions with Christiaan Both and his comments on early drafts were of great help.  
472 Debbie M. Buehler, Lusía Mendes and three anonymous reviewers commented on an earlier  
473 version of the manuscript.

474

## 475 **Funding**

476 This work was supported by a grant from BirdLife Netherlands to BIT, by grants from the  
477 Schure-Beijerinck-Popping Fonds to AH, by a grant from the Regional Government of  
478 Extremadura [POS700013] and from University of Extremadura [A7-22/09 ] to AV. BIT was  
479 supported by a Rosalind Franklin Fellowship and the Netherlands Organization for Scientific  
480 Research. KDM was also supported by a Veni fellowship [863.08.026].

481

482

483

484 Figure 1: Effects of an endotoxin challenge on 10 immune parameters in skylarks as  
485 measured from the blood after 13 h after the experimental start. Experimental birds were  
486 injected with LPS; control birds were un-injected. Means and standard errors are shown;  
487 numbers in bars represent sample sizes. There was never a significant treatment\*season  
488 interaction (all  $p > 0.08$ ). LPS injection had a significant effect on lysis titers, haptoglobin  
489 concentrations and the proportion of lymphocytes, basophils and eosinophils. Full statistical  
490 details can be found in table 1.

491



## References

- Adamo, S. A.** (2004). How should behavioural ecologists interpret measurements of immunity? *Anim. Behav.* **68**, 1443-1449.
- Adelman, J. S., Cordoba-Cordoba, S., Spoelstra, K., Wikelski, M. and Hau, M.** (2010). Radiotelemetry reveals variation in fever and sickness behaviours with latitude in a free-living passerine. *Funct. Ecol.* **24**, 813-823.
- Bonneaud, C., Mazuc, J., Gonzalez, G., Haussy, C., Chastel, O., Faivre, B. and Sorci, G.** (2003). Assessing the Cost of Mounting an Immune Response. *Am. Nat.* **161**, 367-379.
- Boughton, R. K., Joop, G. and Armitage, S. A. O.** (2011). Outdoor immunology: methodological considerations for ecologists. *Funct. Ecol.* **25**, 81-100.
- Bourgeon, S., Martinez, J., Criscuolo, F., Le Maho, Y. and Raclot, T.** (2006). Fasting-induced changes of immunological and stress indicators in breeding female eiders. *Gen. Comp. Endocrinol.* **147**, 336-342.
- Buehler, D. M., Bhola, N., Barjaktarov, D., Goymann, W., Schwabl, I., Tieleman, B. I. and Piersma, T.** (2008). Constitutive immune function responds more slowly to handling stress than corticosterone in a shorebird. *Physiol. Biochem. Zool.* **81**, 673-681.
- Buehler, D. M., Encinas-Viso, F., Petit, M., Vezina, F., Tieleman, B. I. and Piersma, T.** (2009). Limited access to food and physiological trade-offs in a long-distance migrant shorebird. II. Constitutive immune function and the acute-phase response. *Physiol. Biochem. Zool.* **82**, 561-571.
- Buehler, D. M., Piersma, T., Matson, K. and Tieleman, B. I.** (2008). Seasonal redistribution of immune function in a migrant shorebird: annual-cycle effects override adjustments to thermal regime. *Am. Nat.* **172**, 783-796.
- Buehler, D. M., Versteegh, M. A., Matson, K. D. and Tieleman, I.** (2011). One Problem, Many Solutions: Simple Statistical Approaches Help Unravel the Complexity of the Immune System in an Ecological Context. *Plos One* **6**, e18592.
- Burness, G., Armstrong, C., Fee, T. and Tilman-Schindel, E.** (2010). Is there an energetic-based trade-off between thermoregulation and the acute phase response in zebra finches? *J. Exp. Biol.* **213**, 1386-1394.

**Calderwood, S. K., Mambula, S. S., Gray, P. J., Jr. and Therlault, J. R.** (2007). Extracellular heat shock proteins in cell signaling. *FEBS Lett.* **581**, 3689-3694.

**Davis, A. K.** (2005). Effect of handling time and repeated sampling on avian white blood cell counts. *J. Field Ornithol.* **76**, 334-338.

**Davis, A. K., Maney, D. L. and Maerz, J. C.** (2008). The use of leukocyte profiles to measure stress in vertebrates: a review for ecologists. *Funct. Ecol.* **22**, 760-772.

**De Boever, S., Croubels, S., Meyer, E., Sys, S., Beyaert, R., Ducatelle, R. and De Backer, P.** (2009). Characterization of an intravenous lipopolysaccharide inflammation model in broiler chickens. *Avian Pathol.* **38**, 403-411.

**De Coster, G., Verhulst, S., Koetsier, E., De Neve, L., Briga, M. and Lens, L.** (2011). Effects of early developmental conditions on innate immunity are only evident under favourable adult conditions in zebra finches. *Naturwissenschaften* **98**, 1049-1056.

**Demas, G. E., Zysling, D. A., Beechler, B. R., Muehlenbein, M. P. and French, S. S.** (2011). Beyond phytohaemagglutinin: assessing vertebrate immune function across ecological contexts. *J. Anim. Ecol.* **80**, 710-730.

**Deviche, P., Breuner, C. and Orchinik, M.** (2001). Testosterone, corticosterone, and photoperiod interact to regulate plasma levels of binding globulin and free steroid hormone in Dark-eyed Juncos, *Junco hyemalis*. *Gen. Comp. Endocrinol.* **122**, 67-77.

**Feldman, B. F., Zinkl, J. G. and Jain, N. C.** (2000). *Schalm's Veterinary Hematology*, pp. 1344. Philadelphia, London: Lippincott Williams & Wilkins.

**Fleshner, M., Campisi, J., Amiri, L. and Diamond, D.** (2004). Cat exposure induces both intra- and extracellular Hsp72: the role of adrenal hormones. *Psychoneuroendocrinology* **29**, 1142-1152.

**Gehad, A. E., Lillehøj, H. S., Hendricks, G. L. and Mashaly, M. M.** (2002). Initiation of humoral immunity. II. The effects of T-independent and T-dependent antigens on the distribution of lymphocyte populations. *Dev. Comp. Immunol.* **26**, 761-771.

**Gross, W. B. and Siegel, H. S.** (1983). Evaluation of the Heterophil Lymphocyte Ratio as a Measure of Stress in Chickens. *Avian Diseases* **27**, 972-979.

**Hasselquist, D.** (2007). Comparative immunoeology in birds: hypotheses and tests. *J. Ornithol.* **148**, S571-S582.

**Hasselquist, D. and Nilsson, J. A.** (2012). Physiological mechanisms mediating costs of immune responses: what can we learn from studies of birds? *Anim. Behav.* **83**, 1303-1312.

**Hegemann, A., van der Jeugd, H. P., de Graaf, M., Oostebrink, L. L. and Tieleman, B. I.** (2010). Are Dutch Skylarks partial migrants? Ring recovery data and radio-telemetry suggest local coexistence of contrasting migration strategies. *Ardea* **98**, 135-143.

**Hegemann, A., Voesten, R., van Eerde, K., van der Velde, M. and Tieleman, B. I.** (2012a). The use of tongue spots for aging and wing length for sexing Skylarks *Alauda arvensis* - A critical evaluation. *Ring. Migrat.* **27**, 7-12.

**Hegemann, A., Matson, K. D., Versteegh, M. A. and Tieleman, B. I.** (2012b). Wild skylarks seasonally modulate energy budgets but maintain energetically costly inflammatory immune responses throughout the annual cycle. *PLoS ONE* **7**, e36358.

**Hegemann, A., Matson, K. D., Both, C. and Tieleman, B. I.** (2012c). Immune function in a free-living bird varies over the annual cycle, but seasonal patterns differ between years. *Oecologia* **170**, 605-618.

**Huff, G., Huff, W., Rath, N., Donoghue, A., Anthony, N. and Nestor, K.** (2007). Differential effects of sex and genetics on behavior and stress response of turkeys. *Poultry Sci.* **86**, 1294-1303.

**Katiyar, A. K., Vegad, J. L. and Awadhiya, R. P.** (1992). Pathology of inflammatory-reparative response in punched wounds of the chicken skin. *Avian Pathol.* **21**, 471-480.

**Krams, I., Vrublevska, J., Cirule, D., Kivleniece, I., Krama, T., Rantala, M. J., Sild, E. and Hõrak, P.** (2012). Heterophil/lymphocyte ratios predict the magnitude of humoral immune response to a novel antigen in great tits (*Parus major*). *Comp. Biochem. Phys. A* **161**, 422-428.

**Lee, K. A.** (2006). Linking immune defenses and life history at the levels of the individual and the species. *Integr. Comp. Biol.* **46**, 1000-1015.

**Lochmiller, R. L. and Deerenberg, C.** (2000). Trade-offs in evolutionary immunology: just what is the cost of immunity? *Oikos* **88**, 87-98.

**Lynn, S. E., Breuner, C. W. and Wingfield, J. C.** (2003). Short-term fasting affects locomotor activity, corticosterone, and corticosterone binding globulin in a migratory songbird. *Horm. Behav.* **43**, 150-157.

**Mahmoud, K. Z. and Edens, F. W.** (2003). Influence of selenium sources on age-related and mild heat stress-related changes of blood and liver glutathione redox cycle in broiler chickens (*Gallus domesticus*). *Comp. Biochem. Phys. B* **136**, 921-934.

**Martin, L. B.** (2009). Stress and immunity in wild vertebrates: timing is everything. *Gen. Comp. Endocrinol.* **163**, 70-76.

**Martin, L. B., Weil, Z. M. and Nelson, R. J.** (2006). Refining approaches and diversifying directions in ecoimmunology. *Integr. Comp. Biol.* **46**, 1030-1039.

**Martin, L. B., Weil, Z. M. and Nelson, R. J.** (2008). Seasonal changes in vertebrate immune activity: mediation by physiological trade-offs. *Philos. Trans. R. Soc. Lond. B* **363**, 321-339.

**Martinez-Padilla, J.** (2006). Daytime variation in T-cell-mediated immunity of Eurasian kestrel *Falco tinnunculus* nestlings. *J. Avian Biol.* **37**, 419-424.

**Martinez-Padilla, J., Martinez, J., Davila, J. A., Merino, S., Moreno, J. and Millan, J.** (2004). Within-brood size differences, sex and parasites determine blood stress protein levels in Eurasian Kestrel nestlings. *Funct Ecol* **18**, 426-434.

**Matson, K. D., Horrocks, N. P. C., Versteegh, M. A. and Tieleman, B. I.** (2012). Baseline haptoglobin concentrations are repeatable and predictive of certain aspects of a subsequent experimentally-induced inflammatory response. *Comp. Biochem. Phys. A* **162**, 7-15.

**Matson, K. D., Ricklefs, R. E. and Klasing, K. C.** (2005). A hemolysis-hemagglutination assay for characterizing constitutive innate humoral immunity in wild and domestic birds. *Dev. Comp. Immunol.* **29**, 275-286.

**Matson, K.** (2006). Are there differences in immune function between continental and insular birds? *Proc. R. Soc. B* **273**, 2267-2274.

**Matson, K., Cohen, A., Klasing, K., Ricklefs, R. and Scheuerlein, A.** (2006). No simple answers for ecological immunology: relationships among immune indices at the individual level break down at the species level in waterfowl. *Proc. R. Soc. B* **273**, 815-822.

**Matson, K. D., Horrocks, N. P. C., Tieleman, B. I. and Haase, E.** (2012). Intense flight and endotoxin injection elicit similar effects on leukocyte distributions but dissimilar effects on plasma-based immunological indices in pigeons. *J. Exp. Biol.* **215**: 3734-3741.

**Moran, M. D.** (2003). Arguments for rejecting the sequential Bonferroni in ecological studies. *Oikos* **100**, 403-405.

**Murata, H., Shimada, N. and Yoshioka, M.** (2004). Current research on acute phase proteins in veterinary diagnosis: an overview. *Vet. J.* **168**, 28-40.

**Navarro, C., Marzal, A., de Lope, F. and Møller, A. P.** (2003). Dynamics of an immune response in house sparrows *Passer domesticus* in relation to time of day, body condition and blood parasite infection. *Oikos* **101**, 291-298.

**Nelson, R. J.** (2004). Seasonal immune function and sickness responses. *Trends in Immunology* **25**, 187-192.

**Nelson, R. J. and Demas, G. E.** (1996). Seasonal Changes in Immune Function. *Q. Rev. Biol.* **71**, 511-548.

**Norris, K. and Evans, M. R.** (2000). Ecological immunology: life history trade-offs and immune defense in birds. *Behav. Ecol.* **11**, 19-26.

**Ochsenbein, A. F. and Zinkernagel, R. M.** (2000). Natural antibodies and complement link innate and acquired immunity. *Immunology Today* **21**, 624-630.

**Owen-Ashley, N. T., Turner, M., Hahn, T. P. and Wingfield, J. C.** (2006). Hormonal, behavioral, and thermoregulatory responses to bacterial lipopolysaccharide in captive and free-living white-crowned sparrows (*Zonotrichia leucophrys gambelii*). *Horm. Behav.* **49**, 15-29.

**Owen-Ashley, N. T. and Wingfield, J. C.** (2007). Acute phase responses in passerine birds: characterization and seasonal variation. *J. Ornithol.* **148**, 583-591.

**Owen-Ashley, N. T. and Wingfield, J. C.** (2006). Seasonal modulation of sickness behavior in free-living northwestern song sparrows (*Melospiza melodia morphna*). *J. Exp. Biol.* **209**, 3062-3070.

**Pap, P. L., Czirjak, G. A., Vagasi, C. I., Barta, Z. and Hasselquist, D.** (2010a). Sexual dimorphism in immune function changes during the annual cycle in house sparrows. *Naturwissenschaften* **97**, 891-901.

**Pap, P. L., Vagasi, C. I., Tokolyi, J., Czirjak, G. A. and Barta, Z.** (2010b). Variation in haematological indices and immune function during the annual cycle in the Great Tit *Parus major*. *Ardea* **98**, 105-112.

**Pap, P. L., Vagasi, C. I., Czirjak, G. A., Titilincu, A., Pintea, A., Osvath, G., Fueloep, A. and Barta, Z.** (2011). The Effect of Coccidians on the Condition and Immune Profile of Molting House Sparrows (*Passer Domesticus*). *Auk* **128**, 330-339.

**Pedersen, A. B. and Babayan, S. A.** (2011). Wild immunology. *Mol. Ecol.* **20**, 872-880.

**Pockley, A. G.** (2003). Heat shock proteins as regulators of the immune response. *Lancet* **362**, 469-476.

**Pockley, A. G., Muthanal, M. and Calderwood, S. K.** (2008). The dual immunoregulatory roles of stress proteins. *Trends Biochem. Sci.* **33**, 71-79.

**Quaye, I. K.** (2008). Haptoglobin, inflammation and disease. *Trans. R. Soc. Trop. Med. Hyg.* **102**, 735-742.

**R Development Core Team.** (2009). *R: A Language and Environment for Statistical Computing*. Vienna, Austria <http://www.R-project.org>: R Foundation for Statistical Computing.

**Råberg, L., Grahn, M., Hasselquist, D. and Svensson, E.** (1998). On the adaptive significance of stress-induced immunosuppression. *Proc. R. Soc. B* **265**, 1637-1641.

**Sapolsky, R. M., Romero, L. M. and Munck, A. U.** (2000). How do glucocorticoids influence stress responses? Integrating permissive, suppressive, stimulatory, and preparative actions. *Endocr. Rev.* **21**, 55-89.

**Sheldon, B. C. and Verhulst, S.** (1996). Ecological immunology: costly parasite defences and trade-offs in evolutionary ecology. *Trends Ecol. Evol.* **11**, 317-321.

**Sorci, G. and Faivre, B.** (2009). Inflammation and oxidative stress in vertebrate host-parasite systems. *Philos. Trans. R. Soc. Lond. B* **364**, 71-83.

**Thomas, J. S.** (2000). Overview of Plasma Proteins. In (ed. B. F. Feldman, J. G. Zinkl, N. C. Jain and O. W. Schalm), pp. 891-1344. Philadelphia; London: Lippincott Williams & Wilkins.

**Tomás, G., Martínez, J. and Merino, S.** (2004). Collection and analysis of blood samples to detect stress proteins in wild birds. *J. Field Ornithol.* **75**, 281-287.

**van de Crommenacker, J., Horrocks, N. P. C., Versteegh, M. A., Tieleman, B. I., Komdeur, J. and Matson, K. D.** (2010). Effects of immune supplementation and immune challenge on oxidative status and physiology in a model bird: implications for ecologists. *J. Exp. Biol.* **213**, 3527-3535.

**van Dobben, W. H. and Mörzer Bruyna, M. F.** (1939). Zug nach Alter und Geschlecht an niederländischen Leuchttürmen. *Ardea* **28**, 61-71.

**Vleck, C. M., Vertalino, N., Vleck, D. and Bucher, T. L.** (2000). Stress, corticosterone, and heterophil to lymphocyte ratios in free-living Adelie Penguins. *Condor* **102**, 392-400. **Warnes, G. R.** (2009). *Various R Programming Tools for Plotting Data*: R package version 2.7.4.



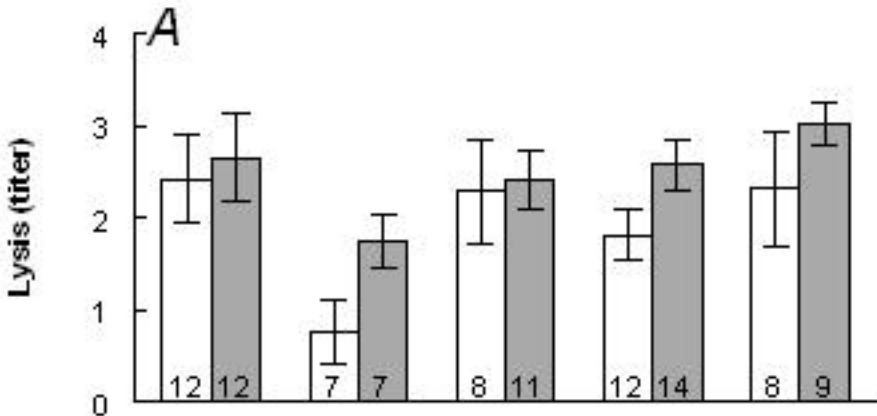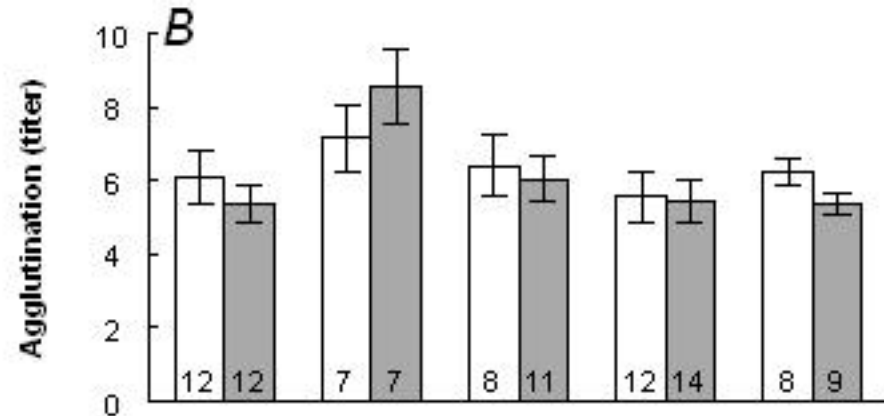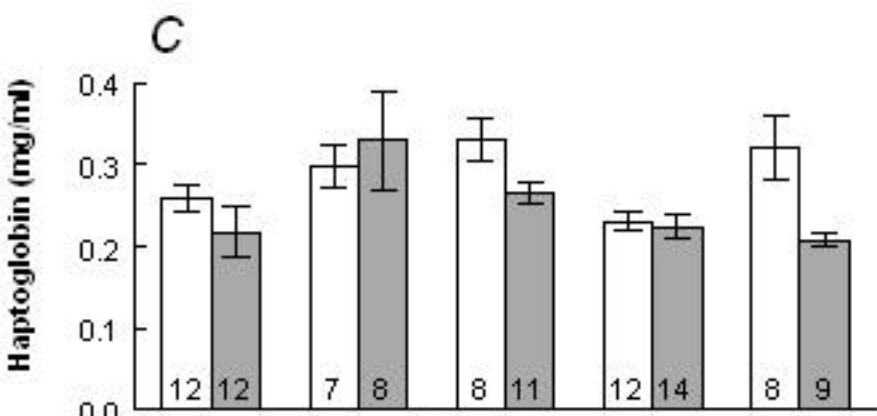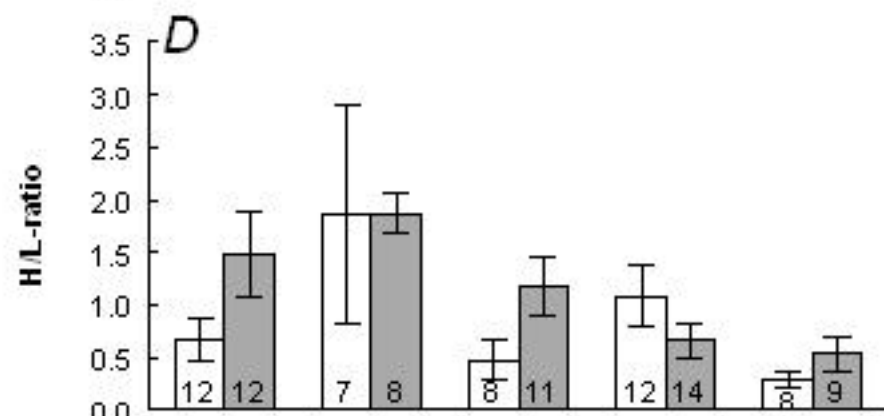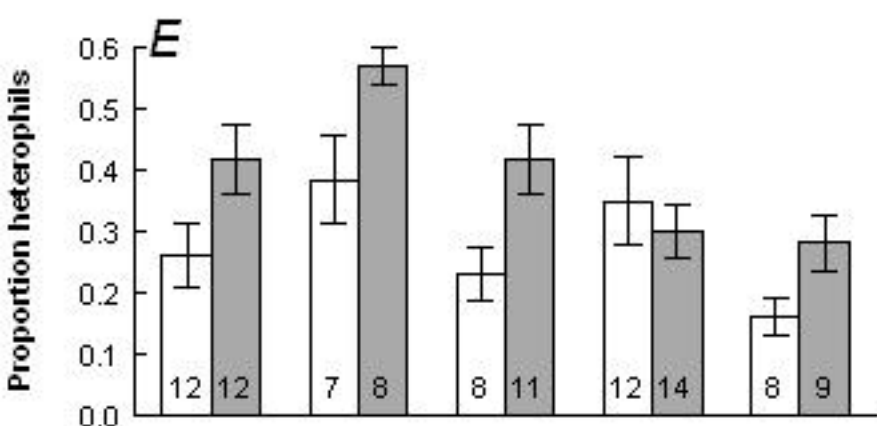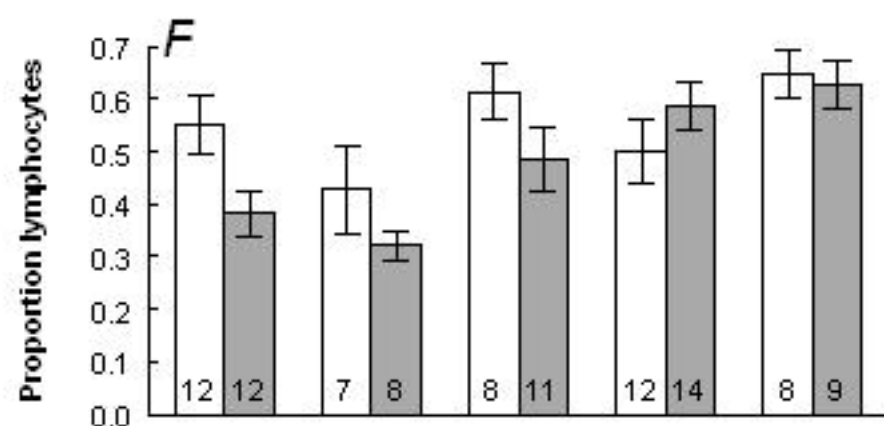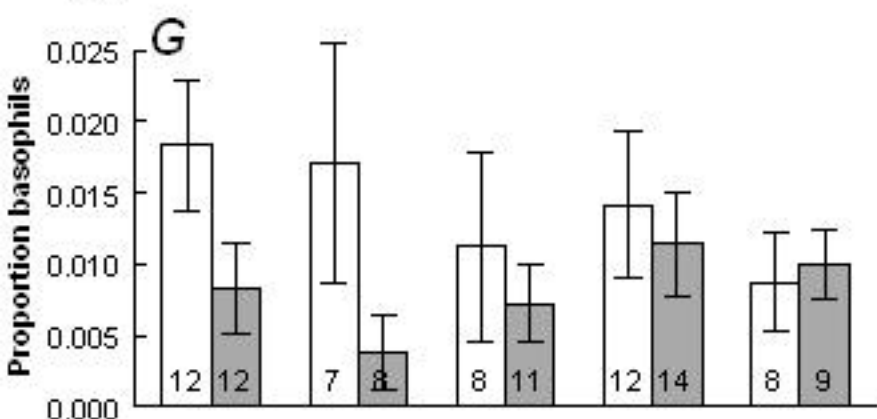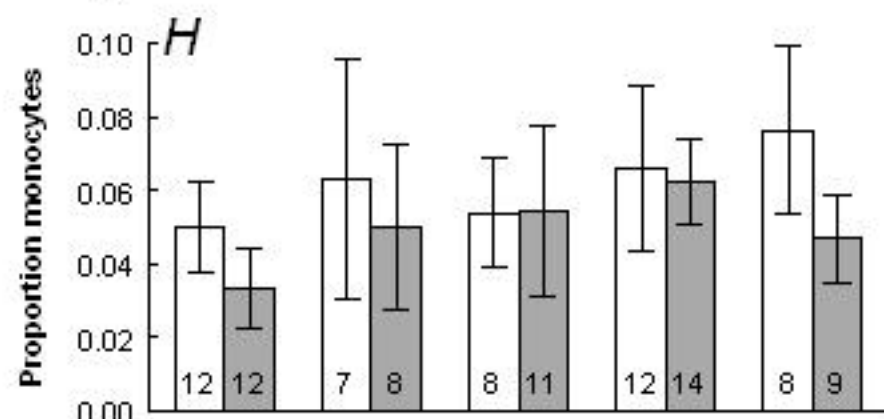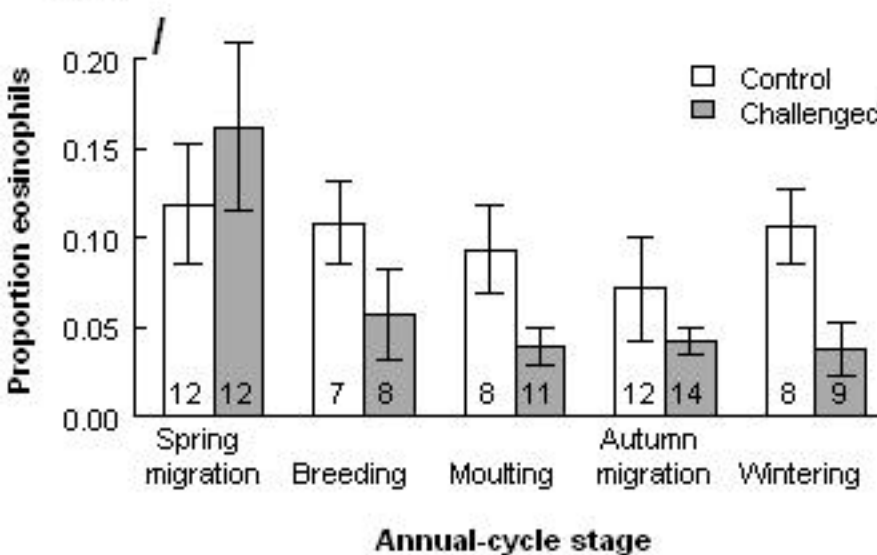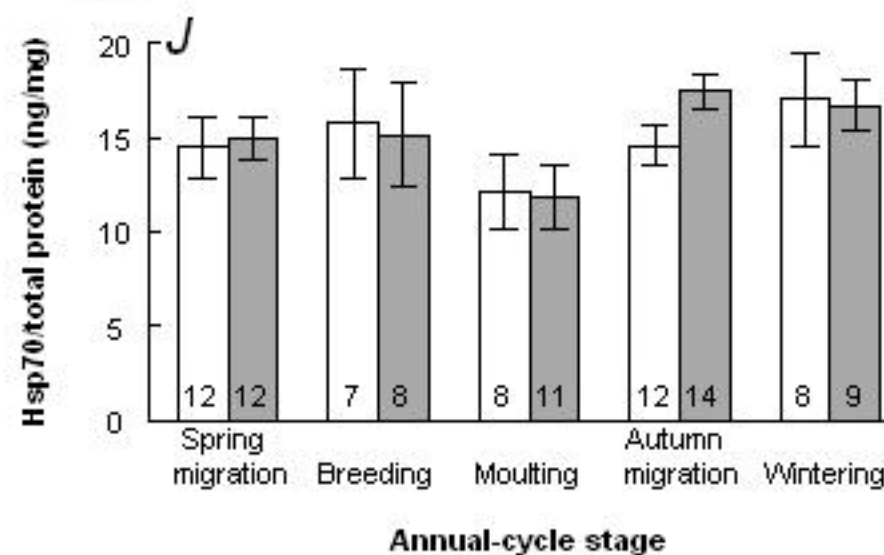

1 Table 1: Statistics and coefficients of linear models for 10 measured parameters in skylarks. Experimental birds were injected with LPS; control birds were  
 2 un-injected. Results are from linear models after removing all non-significant terms ( $P>0.05$ ).

3  
4  
5

| Trait                 | Treatment |                     |                  |                    | Season |                     |                  | Sex   |                     |              |                   | Field value deviation <sup>§</sup> |                     |                  |         | Treatment x season |                     |       |
|-----------------------|-----------|---------------------|------------------|--------------------|--------|---------------------|------------------|-------|---------------------|--------------|-------------------|------------------------------------|---------------------|------------------|---------|--------------------|---------------------|-------|
|                       | df        | Chi <sup>2</sup> /F | p                | $\beta^{\ddagger}$ | df     | Chi <sup>2</sup> /F | p                | df    | Chi <sup>2</sup> /F | p            | $\beta^{\dagger}$ | df                                 | Chi <sup>2</sup> /F | p                | $\beta$ | df                 | Chi <sup>2</sup> /F | p     |
| Lysis titer           | 98,1      | 8.35                | <b>0.004</b>     | 0.679              | 98,4   | 13.68               | <b>0.008</b>     | 98,1  | 3.83                | 0.050        | -0.481            | 98,1                               | 9.14                | <b>0.003</b>     | 0.365   | 98,1               | 4.39                | 0.356 |
| Agglutination titer   | 99,1      | 0.38                | 0.535            |                    | 99,4   | 13.33               | <b>0.010</b>     | 99,1  | 2.16                | 0.142        |                   | 99,1                               | 0.42                | 0.516            |         | 99,1               | 3.53                | 0.474 |
| Haptoglobin           | 100,1     | 12.36               | <b>&lt;0.001</b> | -0.172             | 100,4  | 22.99               | <b>&lt;0.001</b> | 100,1 | 7.54                | <b>0.006</b> | -0.140            | 100,1                              | 8.87                | <b>0.003</b>     | 0.514   | 100,1              | 8.26                | 0.083 |
| Heterophil:Lymphocyte | 100,1     | 2.42                | 0.120            |                    | 100,4  | 15.12               | <b>0.004</b>     | 100,1 | 0.01                | 0.924        |                   | 100,1                              | 2.72                | 0.099            |         | 100,1              | 4.79                | 0.309 |
| Heterophils           | 100,1     | 12.71               | <b>0.005</b>     | 0.589              | 100,4  | 4.59                | <b>0.002</b>     | 100,1 | 0.01                | 0.931        |                   | 100,1                              | 8.61                | <b>0.004</b>     | 0.026   | 100,1              | 1.99                | 0.103 |
| Lymphocytes           | 100,1     | 4.59                | <b>0.035</b>     | -0.311             | 100,4  | 5.30                | <b>&lt;0.001</b> | 100,1 | 1.15                | 0.286        |                   | 100,1                              | 11.10               | <b>0.001</b>     | 0.014   | 100,1              | 2.23                | 0.072 |
| Basophils             | 100,1     | 4.37                | <b>0.039</b>     | -0.520             | 100,4  | 0.48                | 0.747            | 100,1 | 0.93                | 0.337        |                   | 100,1                              | 1.27                | 0.263            |         | 100,1              | 1.30                | 0.278 |
| Monocytes             | 100,1     | 0.68                | 0.412            |                    | 100,4  | 0.58                | 0.676            | 100,1 | 0.35                | 0.852        |                   | 100,1                              | 0.07                | 0.788            |         | 100,1              | 0.19                | 0.943 |
| Eosinophils           | 100,1     | 7.25                | <b>0.008</b>     | -0.505             | 100,4  | 2.80                | <b>0.031</b>     | 100,1 | 9.19                | <b>0.003</b> | 0.576             | 100,1                              | 22.57               | <b>&lt;0.001</b> | 0.033   | 100,1              | 1.84                | 0.129 |
| Heat Shock Protein 70 | 99,1      | 0.50                | 0.481            |                    | 99,4   | 9.50                | <b>0.049</b>     | 99,1  | 0.16                | 0.686        |                   | 99,1                               | 0.47                | 0.495            |         | 99,1               | 1.75                | 0.781 |

6

7 <sup>†</sup>Reference category is 'male'.

8 <sup>‡</sup>Reference category is 'control'.

9 <sup>§</sup>A derived covariate calculated per individual as follows: (individual trait value) - (sex- and season-specific trait mean).
